# Supplementary material for: Novel cobalt-doped molybdenum oxynitride quantum dot@N-doped carbon nanosheets with abundant oxygen vacancies for long-life rechargeable zinc–air batteries
Source: Royal Society of Chemistry journal article supplement (doi:10.1039/d0ta12414a), 2021-01-01
Supplement: d0ta12414a1.pdf [file d0ta12414a1.pdf]

Electronic Supplementary Information

**Novel cobalt-doped molybdenum oxynitride quantum dots@N-doped carbon nanosheets with abundant oxygen vacancies for long-life rechargeable zinc-air batteries**

Thanh Tuan Nguyen,<sup>ab</sup> Jayaraman Balamurugan,<sup>a</sup> Kin-Tak Lau,<sup>b</sup> Nam Hoon Kim,<sup>\*a</sup> Joong Hee Lee<sup>\*ac</sup>

<sup>a</sup>Advanced Materials Institute of Nano Convergence Technology (BK21 Four) & Dept. of Nano Convergence Technology, Jeonbuk National University, Jeonju, Jeonbuk, 54896, Republic of Korea.

<sup>b</sup>Faculty of Science, Engineering and Technology, Swinburne University of Technology, John St., Hawthorn, Melbourne, VIC, 3122, Australia.

<sup>c</sup>Carbon Composite Research Centre, Department of Polymer - Nano Science and Technology, Jeonbuk National University, Jeonju, Jeonbuk, 54896, Republic of Korea.

E-mail: [nhk@jbnu.ac.kr](mailto:nhk@jbnu.ac.kr); [jhl@jbnu.ac.kr](mailto:jhl@jbnu.ac.kr)

## 1. Calculations

The RDE and RRDE measurements were carried out at different rotational speeds from 400 to 2800 rpm (400 rpm for each step) in an O<sub>2</sub>-saturated 0.1 M KOH electrolyte. The number of electrons transferred in ORR was calculated from the Koutecky-Levich formula:<sup>1</sup>

$$\frac{1}{j_L} = \frac{1}{j_K} + \left( \frac{1}{0.62nFC D^{2/3} \nu^{-1/6}} \right) \omega^{-1/2} \quad (1)$$

where  $j_K$  is kinetic current density,  $n$  is the number of electron transfer,  $F$  is the Faraday constant (96,485 C mol<sup>-1</sup>),  $C$  is the concentration of oxygen in the electrolyte ( $1.2 \times 10^{-6}$  mol cm<sup>-3</sup>),  $D$  is the diffusion coefficient of oxygen in the solution ( $1.9 \times 10^{-5}$  cm<sup>2</sup> s<sup>-1</sup>),  $\nu$  is the dynamic viscosity of the aqueous 0.1 M KOH electrolyte (0.01 cm<sup>2</sup> s<sup>-1</sup>), and  $\omega$  is rotational speed.

The RRDE measurement was exemplified to investigate the 4 e<sup>-</sup> sensitivity. The H<sub>2</sub>O<sub>2</sub> yield and electron transfer ( $n$ ) were calculated by the following equations:<sup>1</sup>

$$n = \frac{4j_D}{j_D + \frac{j_R}{N}} \quad (2)$$

$$H_2O_2 \text{ yield (\%)} = \frac{\frac{2j_R}{N}}{j_D + \frac{j_R}{N}} \times 100 \quad (3)$$

where  $j_D$  and  $j_R$  is the Faradaic current on the disk and ring, respectively.  $N$  is the H<sub>2</sub>O<sub>2</sub> collection coefficient of the ring (0.37).

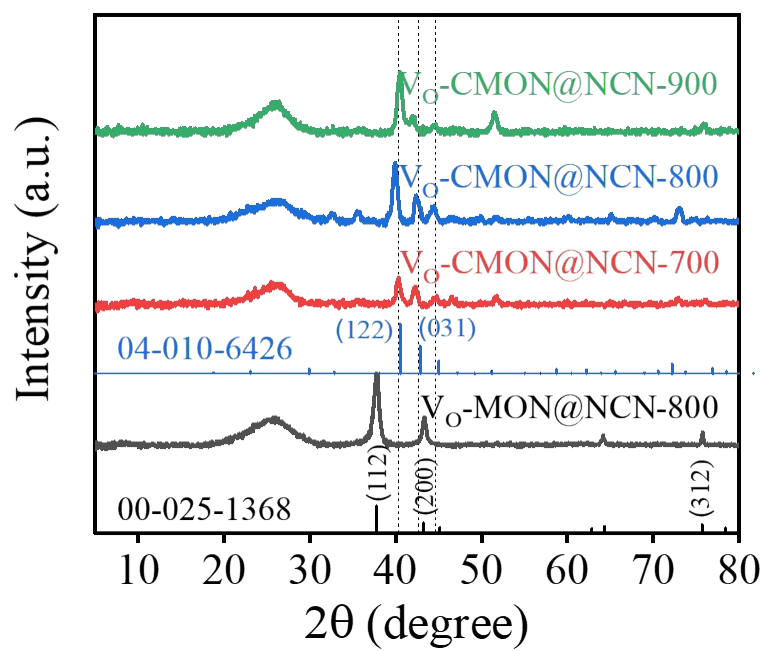

**Fig. S1.** The XRD patterns of V<sub>O</sub>-CMON@NCN with different pyrolysis temperature

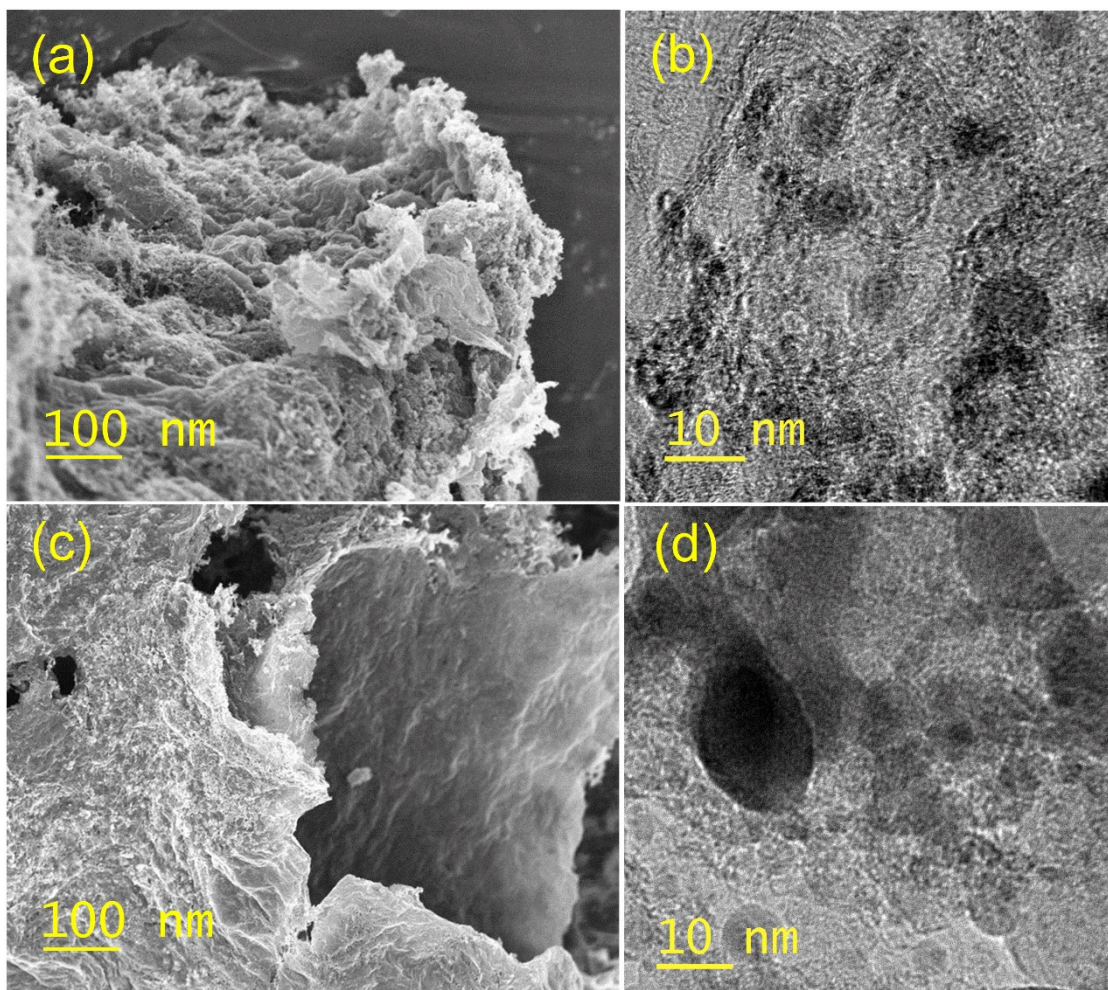

**Fig. S2.** SEM and HR-TEM images of (a, b) V<sub>O</sub>-CMON@NCN-700 and (c, d) V<sub>O</sub>-CMON@NCN-900.

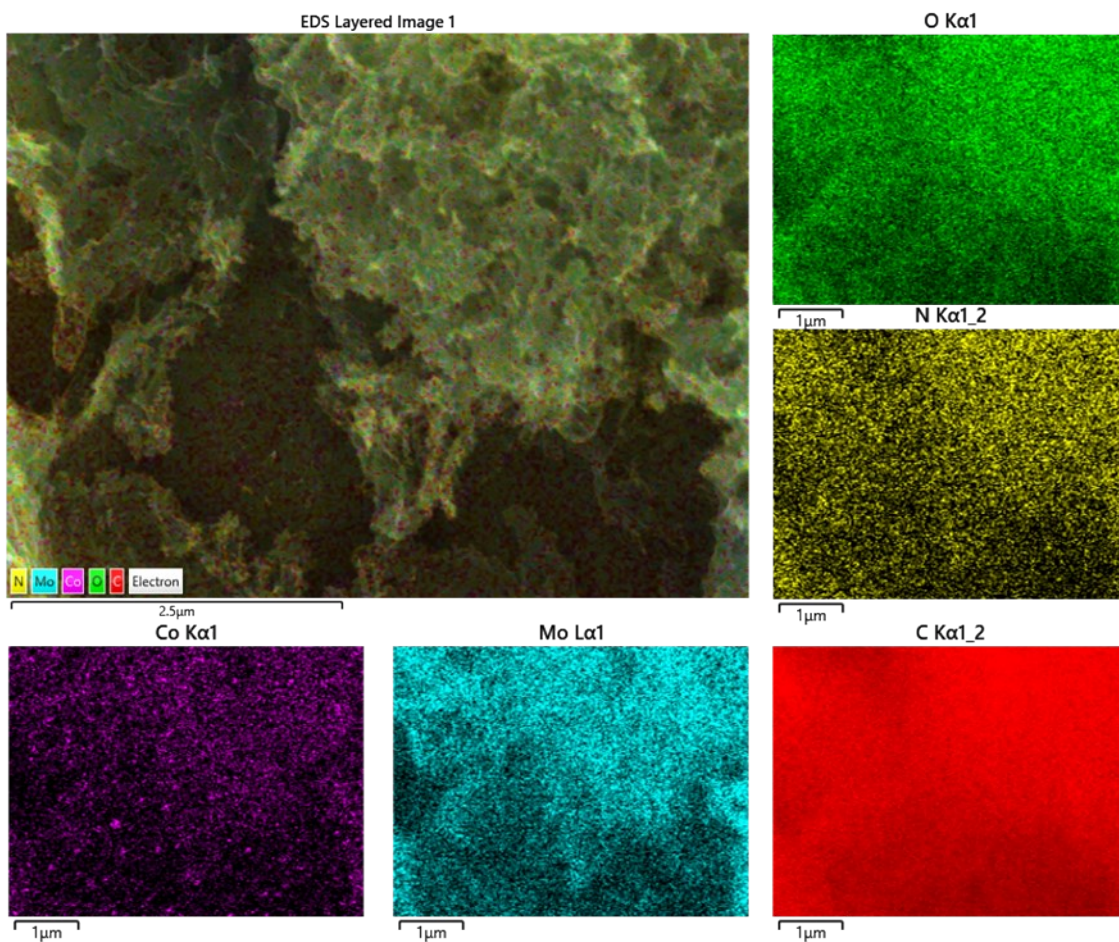

**Fig. S3.** SEM-EDS color mapping analysis of V<sub>O</sub>-CMON-800@NCN and corresponding elemental distributions of Co, Mo, O, N, and C.

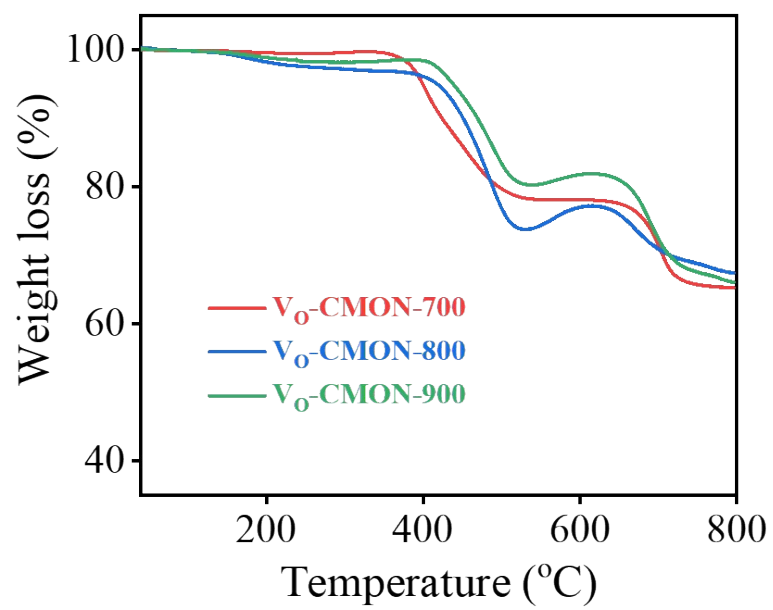

**Fig. S4.** The TGA of all materials with different pyrolysis temperature from 700 to 900 °C



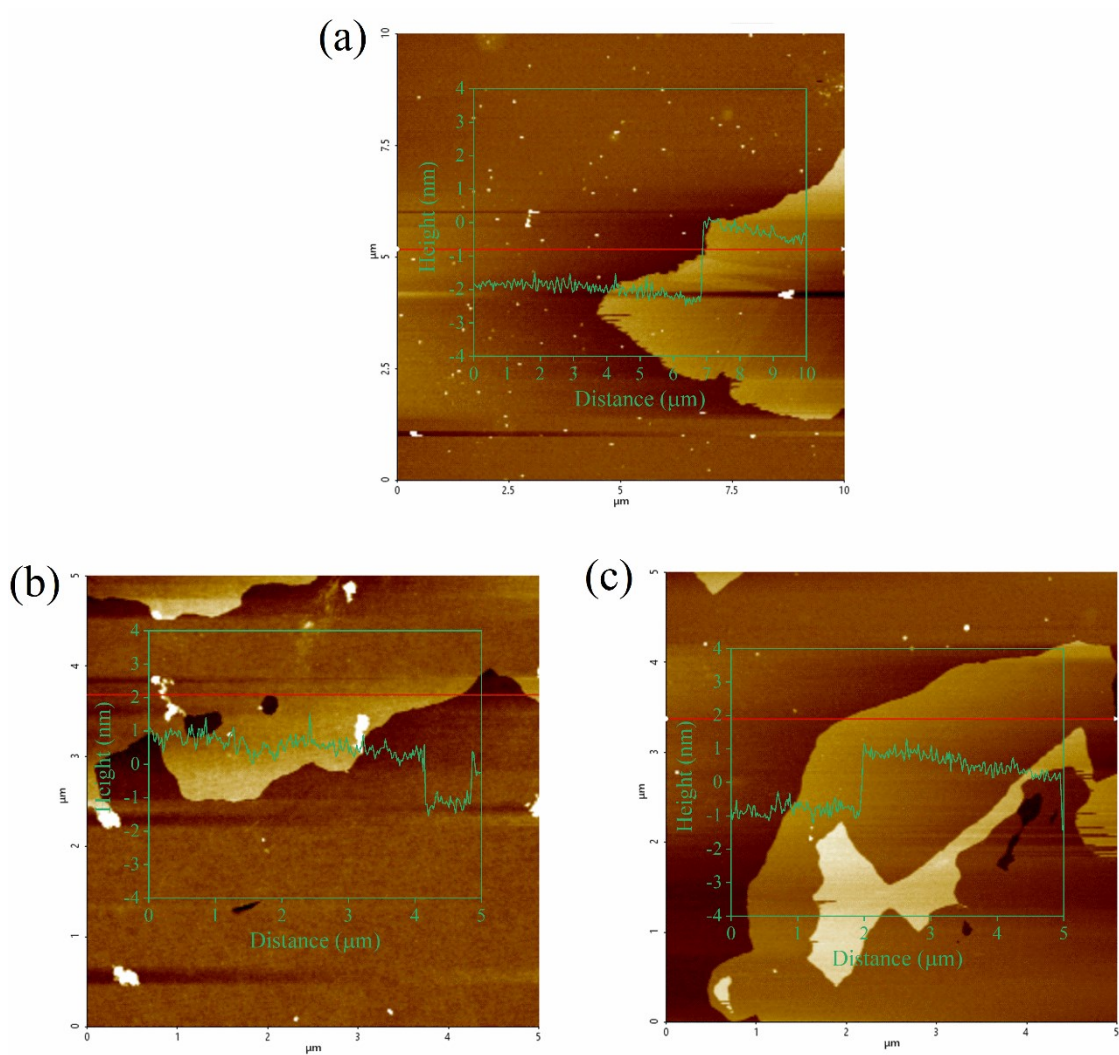

**Fig. S5.** AFM images for the (a)  $V_O$ -CMON@NCN-700; (b)  $V_O$ -CMON@NCN-800, and (c)  $V_O$ -CMON@NCN-900 nanohybrids.

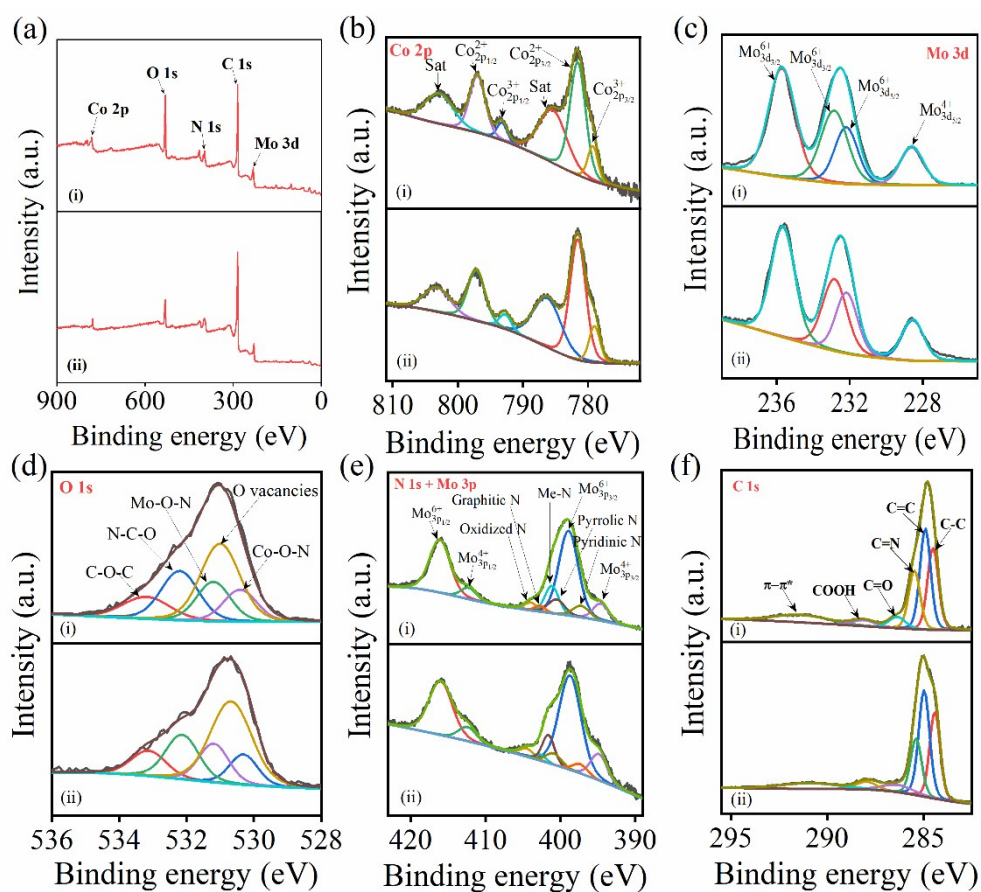

**Fig. S6.** (a) XPS survey and high-resolution XPS of (b) Co 2p, (c) Mo 3d, (d) O 1s, (e) N 1s + Mo 3p, (f) C 1s for (i)  $V_O$ -CMON@NCN-700 and (ii)  $V_O$ -CMON@NCN-900 nanohybrids.



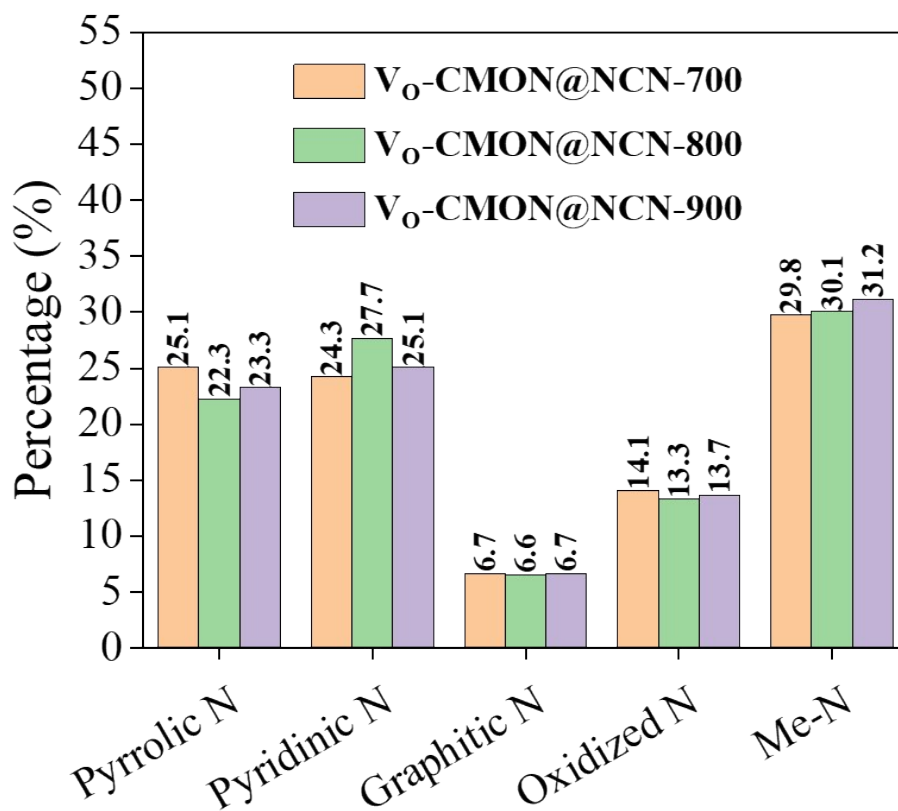

**Fig. S7.** The percentage of pyrrolic N, pyridinic N, graphitic N, oxidized N and Me-N in all catalyst materials.

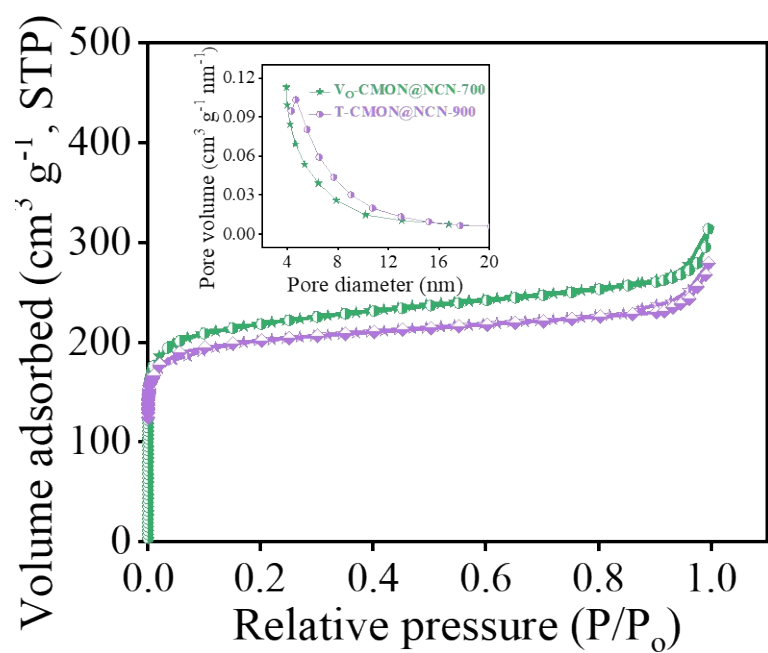

**Fig. S8.** BET of V<sub>O</sub>-CMON@NCN-700; TGA V<sub>O</sub>-CMON@NCN-900

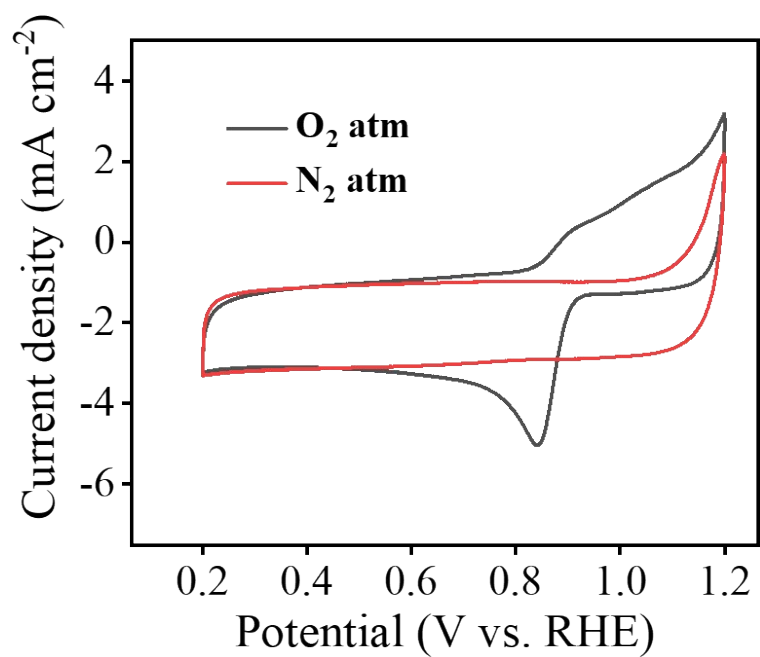

**Fig. S9.** The CV curves of V<sub>O</sub>-CMON@NCN-800 at a fixed scan rate of 50 mV s<sup>-1</sup> in N<sub>2</sub> and O<sub>2</sub>-saturated 0.1 M KOH electrolyte.

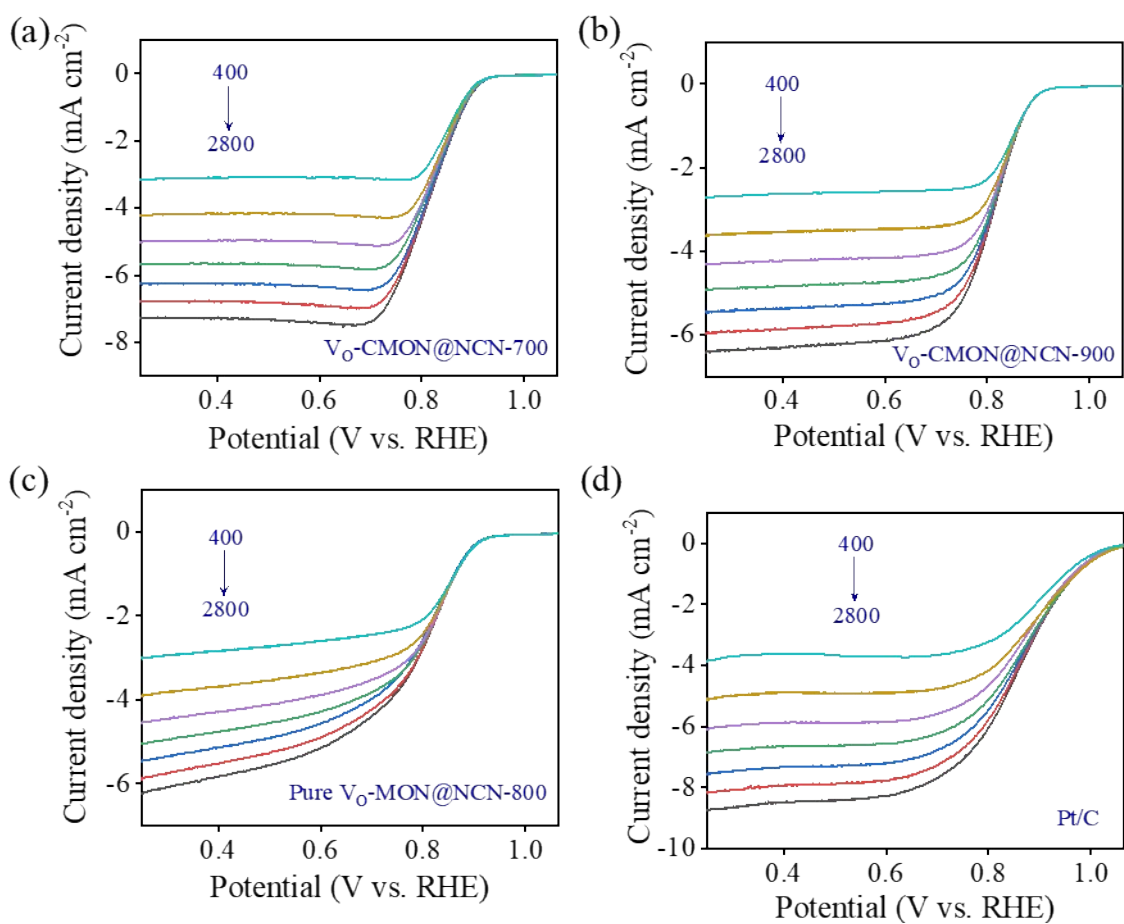

**Fig. S10.** LSV at different rotation speed from 400 to 2800 rpm of (a)  $V_O$ -CMON@NCN-700, (b)  $V_O$ -CMON@NCN-900, (c) Pure  $V_O$ -MON@NCN-800, and Pt/C.

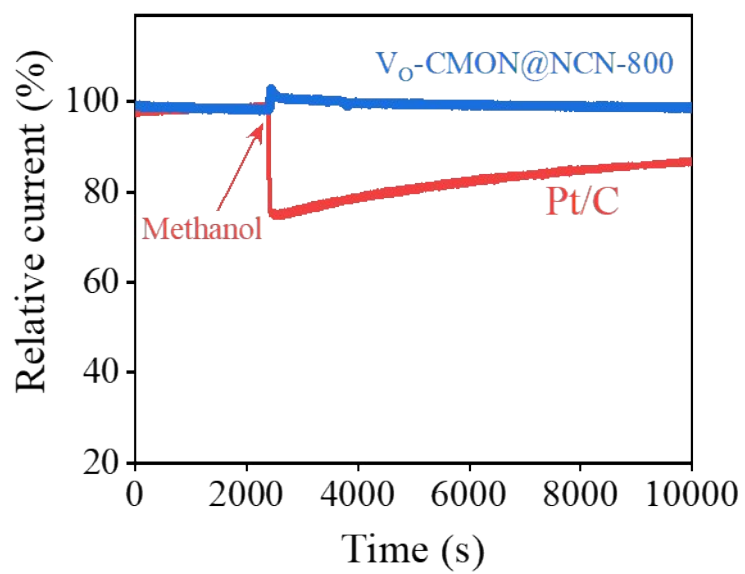

**Fig. S11.** Methanol-tolerance evaluation of V<sub>O</sub>-CMON@NCN-800 and Pt/C in O<sub>2</sub>-saturated 0.1 m KOH solution.



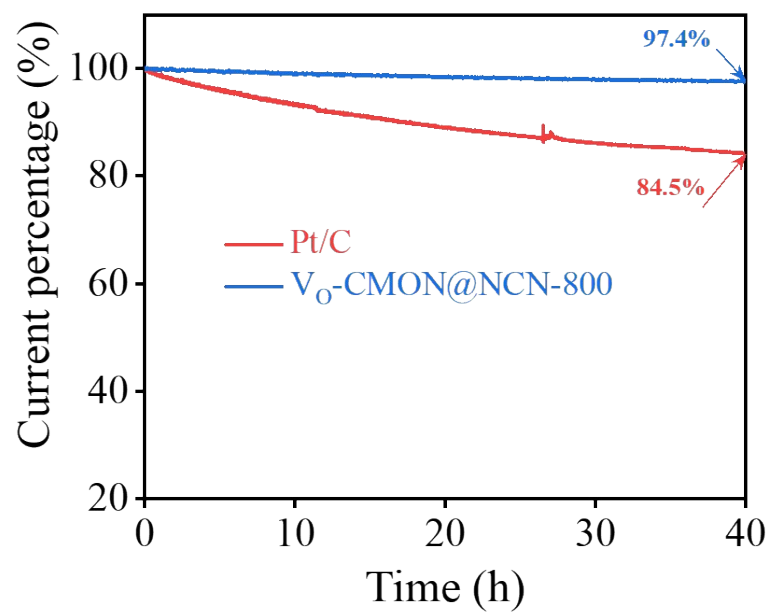

**Fig. S12.** Long-term stability of V<sub>O</sub>-CMN@NCN-800 and Pt/C catalyst after 40 h.

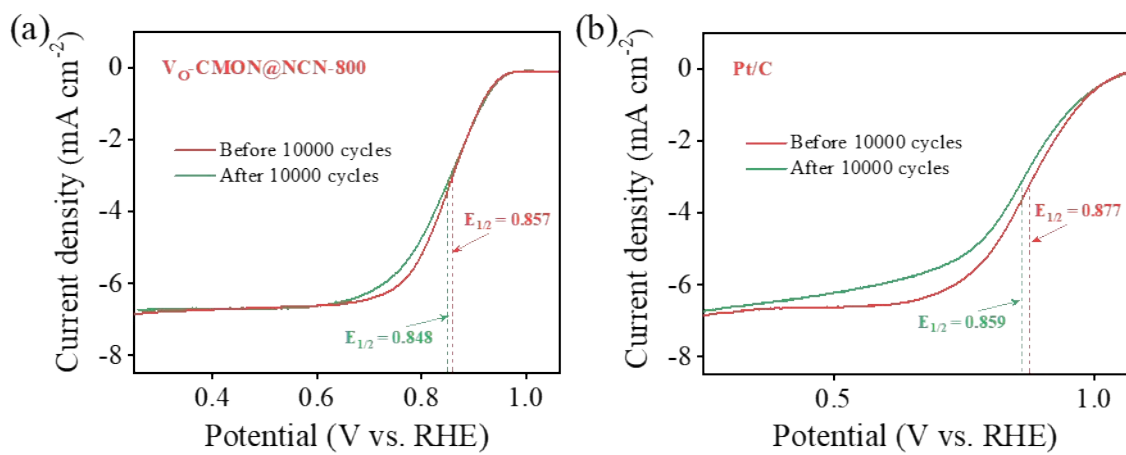

**Fig. S13.** LSV of V<sub>O</sub>-CMON@NCN-800 and Pt/C at 1600 rpm before and after 10000 CV cycles

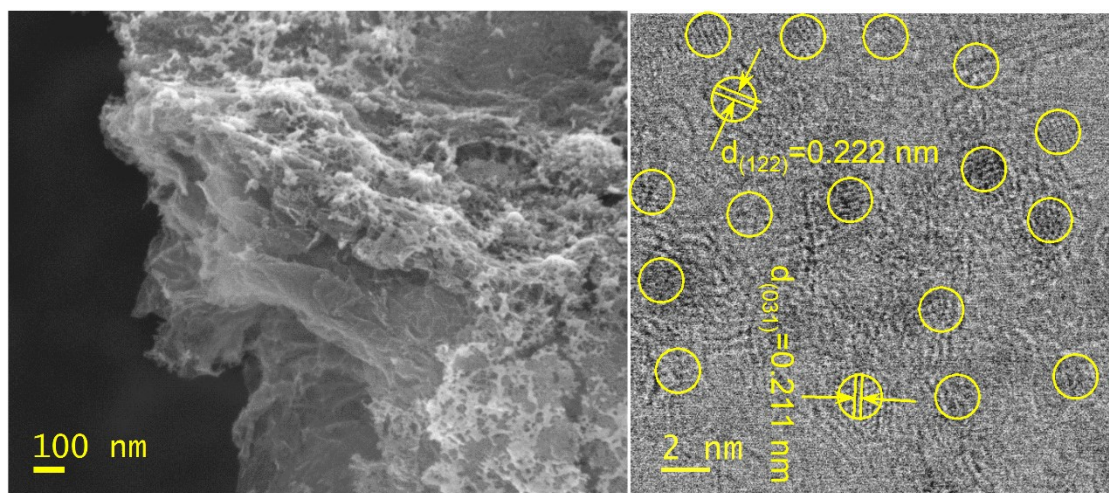

**Fig. S14.** SEM and TEM images of  $V_{\text{O}}\text{-CMON@NCN-800}$  catalyst after 10000 CV cycles ORR stability test.

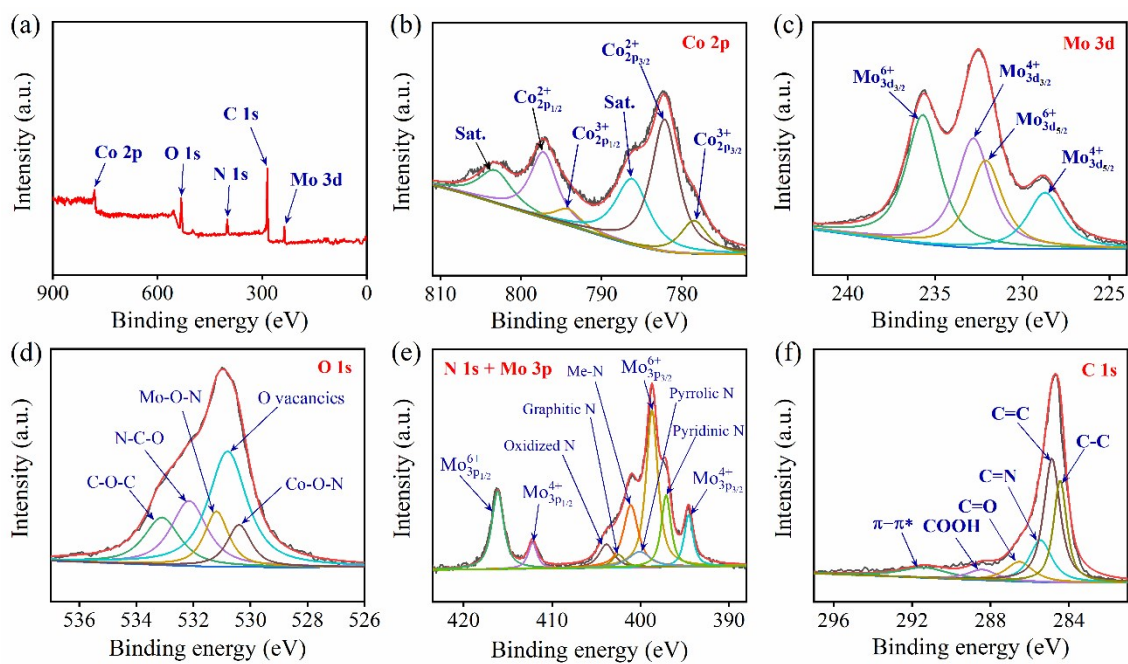

**Fig. S15.** XPS of  $V_{O}$ -CMON@NCN-800 catalyst after 10000 CV cycles ORR stability test.

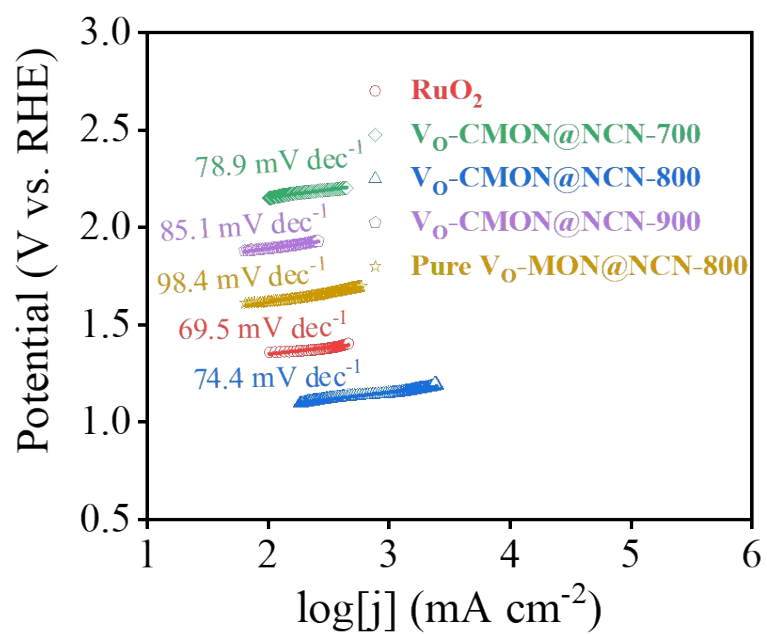

**Fig. S16.** Tafel plots of as-obtained catalysts toward OER measurement.



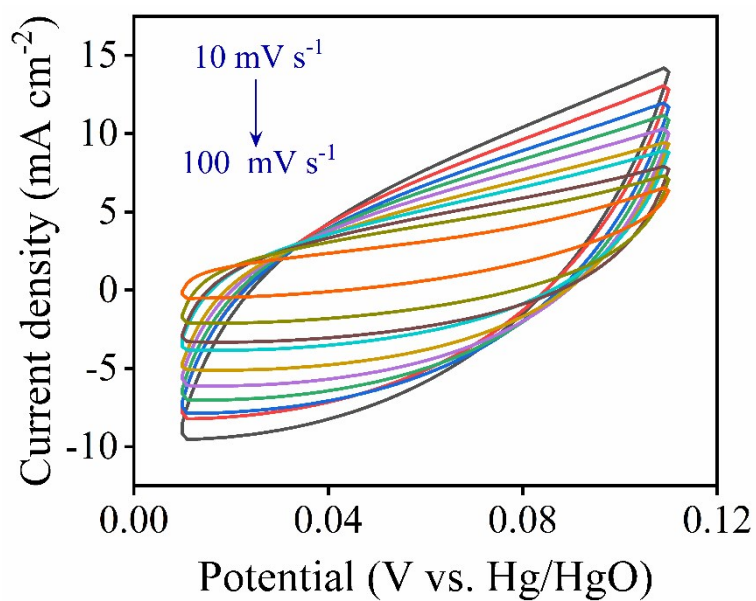

**Fig. S17.** CV curves of V<sub>O</sub>-CMON@NCN-800 at different sweep rate of 10 to 100 mV s<sup>-1</sup>.

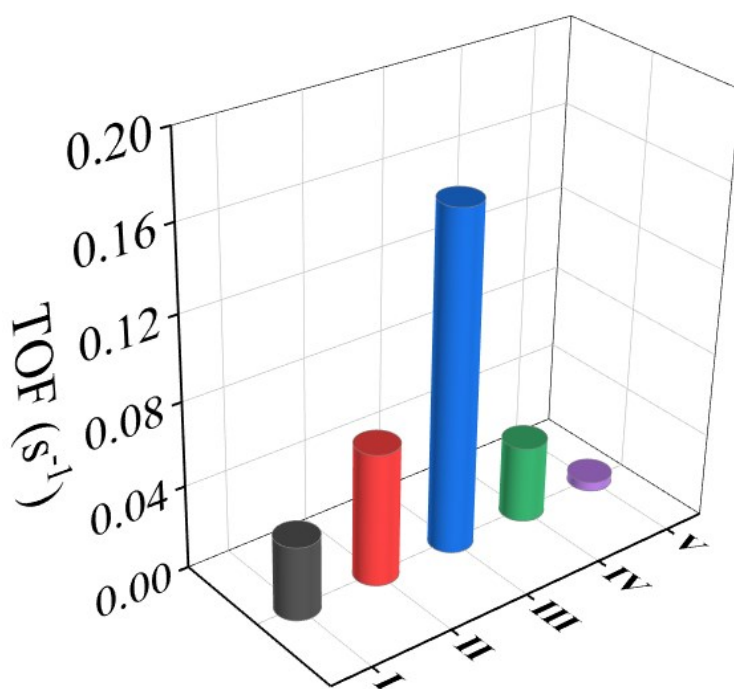

**Fig. S18.** TOF at the overpotential of 260 mV for the (I) RuO<sub>2</sub>, (II) V<sub>O</sub>-CMON@NCN-700, (III) V<sub>O</sub>-CMON@NCN-800, (IV) V<sub>O</sub>-CMON@NCN-900, and (V) V<sub>O</sub>-MON@NCN-800 catalysts.

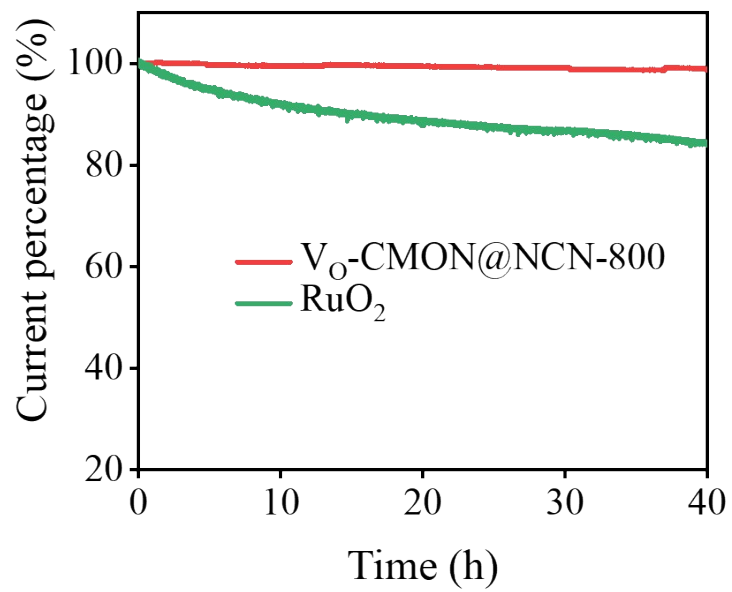

**Fig. S19.** Long-term stability of V<sub>O</sub>-CMON@NCN-800 and RuO<sub>2</sub> catalyst after 40 h.

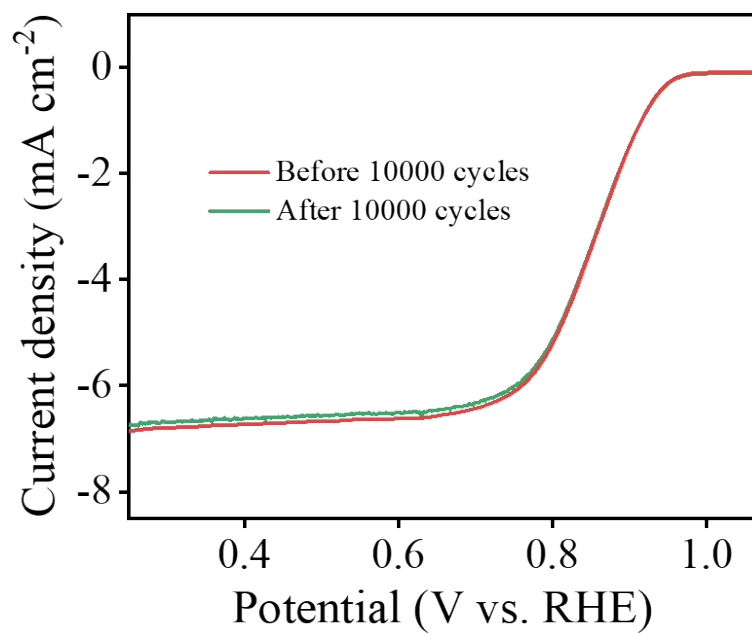

**Fig. S20.** LSV curves of V<sub>O</sub>-CMON@NCN-800 before and after 10000 CV cycles.

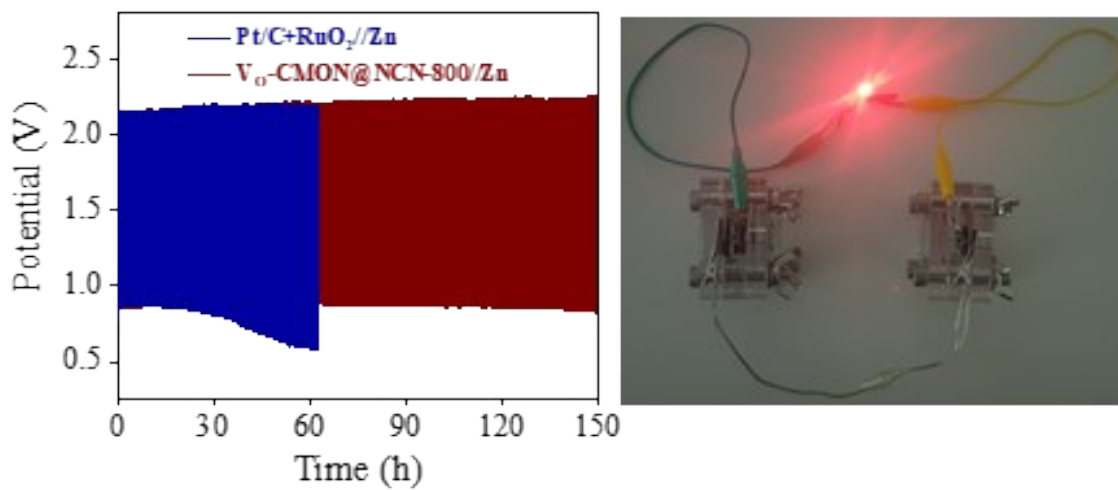

**Fig. S21.** Cycle stability of ZABs at a high current density of  $20 \text{ mA cm}^{-2}$  and a series-connected ZABs powered a red LED.

**Table S1.** Element composition of all catalyst materials estimated from ICP-AES

| <b>Samples</b>               | <b>Co</b><br><b>[wt%]</b> | <b>Mo</b><br><b>[wt%]</b> | <b>N</b><br><b>[wt%]</b> | <b>O</b><br><b>[wt%]</b> | <b>C</b><br><b>[wt%]</b> |
|------------------------------|---------------------------|---------------------------|--------------------------|--------------------------|--------------------------|
| Pure V <sub>o</sub> -MON@NCN |                           | 26.7                      | 14.4                     | 16.4                     | 42.5                     |
| V <sub>o</sub> -CMON@NCN-700 | 17.3                      | 22.1                      | 13.2                     | 13.1                     | 34.3                     |
| V <sub>o</sub> -CMON@NCN-800 | 17.1                      | 19.9                      | 14.5                     | 12.8                     | 35.7                     |
| V <sub>o</sub> -CMON@NCN-800 | 16.9                      | 19.8                      | 13.9                     | 13.5                     | 35.9                     |

Co, Mo, O, N, and C contents were detected by ICP-AES measurement.



**Table S2.** The catalytic activities of the reported non-noble bifunctional catalysts for ORR.

| ORR catalysts                           | Catalyst loading<br>(mg cm <sup>-2</sup> ) | Electrolyte | E <sub>1/2</sub><br>(V vs. RHE) | Ref#      |
|-----------------------------------------|--------------------------------------------|-------------|---------------------------------|-----------|
| V <sub>o</sub> -CMON@NCN-800            | 0.1                                        | 0.1 M KOH   | 0.857                           | This work |
| Ni <sub>3</sub> Fe/N-C sheets           | 0.13                                       | 0.1 M KOH   | 0.78                            | 2         |
| NiFe-LDH/Co <sub>3</sub> NCNF           | 0.79                                       | 0.1 M KOH   | 0.79                            | 3         |
| N-CG-CoO                                | 0.1                                        | 0.1 M KOH   | 0.78                            | 4         |
| Mn oxide                                | -                                          | 0.1 M KOH   | 0.73                            | 5         |
| NiFe@NCX                                | 0.40                                       | 0.1 M KOH   | 0.86                            | 6         |
| Co/Co <sub>3</sub> O <sub>4</sub> @PGS  | 0.3                                        | 0.1 M KOH   | 0.89                            | 7         |
| NiO/CoN PINWs                           | 0.20                                       | 0.1 M KOH   | 0.68                            | 8         |
| S <sub>3</sub> N-Fe/N/C-CNT             | 0.25                                       | 0.1 M KOH   | 0.84                            | 9         |
| GH-BGQD                                 | -                                          | 0.1 M KOH   | 0.73                            | 10        |
| Ni-MnO/rGO aerogel                      | 0.25                                       | 0.1 M KOH   | 0.78                            | 11        |
| NiCo/PFC                                | 0.13                                       | 0.1 M KOH   | 0.77                            | 12        |
| NC@Co-NGC                               | -                                          | 0.1 M KOH   | 0.82                            | 13        |
| Co-N <sub>x</sub> -C                    | 0.25                                       | 0.1 M KOH   | 0.80                            | 14        |
| CoZn-NC700                              | -                                          | 0.1 M KOH   | 0.84                            | 15        |
| NiCo <sub>3</sub> S <sub>4</sub> /N-CNT | 0.25                                       | 0.1 M KOH   | 0.80                            | 16        |

**Table S3.** The catalytic activities of the reported non-noble catalysts for OER.

| OER catalysts                           | Catalyst loading (mg cm <sup>-2</sup> ) | Electrolyte | E <sub>j=10</sub> (V vs. RHE) | Ref#      |
|-----------------------------------------|-----------------------------------------|-------------|-------------------------------|-----------|
| V <sub>o</sub> -CMON@NCN-800            | 0.1                                     | 0.1 M KOH   | 1.47                          | This work |
| Ni <sub>3</sub> Fe/N-C sheets           | 0.13                                    | 0.1 M KOH   | 1.60                          | 2         |
| NiFe-LDH/Co,NCNF                        | 0.79                                    | 0.1 M KOH   | 1.54                          | 3         |
| N-CG-CoO                                | 0.1                                     | 0.1 M KOH   | 1.37                          | 4         |
| Mn oxide                                | -                                       | 0.1 M KOH   | 1.77                          | 5         |
| NiFe@NCX                                | 0.40                                    | 0.1 M KOH   | 1.55                          | 6         |
| Co/Co <sub>3</sub> O <sub>4</sub> @PGS  | 0.3                                     | 0.1 M KOH   | 1.58                          | 7         |
| NiO/CoN PINWs                           | 0.20                                    | 0.1 M KOH   | 1.53                          | 8         |
| S,N-Fe/N/C-CNT                          | 0.25                                    | 0.1 M KOH   | 1.60                          | 9         |
| GH-BGQD                                 | -                                       | 0.1 M KOH   | 1.60                          | 10        |
| Ni-MnO/rGO aerogel                      | 0.25                                    | 0.1 M KOH   | 1.60                          | 11        |
| NiCo/PFC                                | 0.13                                    | 0.1 M KOH   | 1.62                          | 12        |
| NC@Co-NGC                               | -                                       | 0.1 M KOH   | 1.64                          | 13        |
| Co-N <sub>x</sub> -C                    | 0.25                                    | 0.1 M KOH   | 1.75                          | 14        |
| CoZn-NC700                              | -                                       | 0.1 M KOH   | 1.63                          | 15        |
| NiCo <sub>3</sub> S <sub>4</sub> /N-CNT | 0.25                                    | 0.1 M KOH   | 1.60                          | 16        |
| NPMC-1000                               | -                                       | 0.1 M KOH   | 1.42                          | 17        |

**Table S4.** The comparative performance of the ZAB with recently reported non-noble air cathode based ZAB devices in alkaline electrolytes.

| Air cathode                                          | OCP (V) | Power density (mW cm <sup>-2</sup> ) | Specific capacity (mAh g <sub>zn</sub> <sup>-1</sup> @mA cm <sup>-2</sup> ) | Energy density (W h g <sup>-1</sup> @mA cm <sup>-2</sup> ) | Durability (h)                     | Ref#      |
|------------------------------------------------------|---------|--------------------------------------|-----------------------------------------------------------------------------|------------------------------------------------------------|------------------------------------|-----------|
| V <sub>O</sub> -CMON@NCN-800                         | 1.403   | 143.7                                | -                                                                           | 841                                                        | 500 h                              | This work |
| Co <sub>4</sub> N/CNW/C                              | 1.40    | 174                                  | -                                                                           | -                                                          | 1200s/cycle for 408 cycles; 136 h  | 18        |
| NPMC-1100                                            | 1.48    | 55                                   | 735@5                                                                       | 835@5                                                      | 600 cycles/100 h                   | 17        |
| NiFe@NC <sub>x</sub>                                 | -       | 87                                   | 583.7@10                                                                    | 732.3@10                                                   | 600s/200 cycles; 33.33 h           | 6         |
| NiO/CoN PINWs                                        | 1.46    | 79.6                                 | 690@5                                                                       | 945@5                                                      | 600 s/cycle for 25 cycles; 8.3 h   | 8         |
| GH-BGQD                                              | 1.48    | 112                                  | -                                                                           | 810                                                        | 70 h                               | 10        |
| Ni-MnO/rGO aerogel                                   | -       | 123                                  | 758@5                                                                       | 930@5                                                      | 100 cycles                         | 11        |
| CoZn-NC-700                                          | 1.42    | 152                                  | 578@10                                                                      | 694@10                                                     | 600 s/cycle for 385 cycles         | 15        |
| NGM-Co                                               | 1.44    | 152                                  | 749.4@20                                                                    | 840@20                                                     | 1350s/cycle for 160 cycles; 60 h   | 14        |
| C-MOF-C <sub>2</sub> -900                            | 1.46    | 105                                  | 741@10                                                                      | -                                                          | 300 cycles; 120 h                  | 19        |
| CoS <sub>x</sub> @PCN/rGO                            | 1.38    | -                                    | -                                                                           | 634                                                        | 400s /cycle for 394 cycle; 43.8 h  | 20        |
| N-GCNT/FeCo                                          | 1.48    | 89.3                                 | 872.2@100                                                                   | 653.2@100                                                  | -                                  | 21        |
| ZnCo <sub>2</sub> O <sub>4</sub> /N-CNT              | 1.47    | 82.3                                 | 428.47@100                                                                  | 595.57@100                                                 | 600s/ cycle for 23 cycles; 320 min | 22        |
| Fe <sub>0.5</sub> Co <sub>0.5</sub> O <sub>x</sub>   | 1.44    | 86                                   | 709@25                                                                      | 806@25                                                     | 120 h                              | 23        |
| Co <sub>3</sub> FeS <sub>1.5</sub> (OH) <sub>6</sub> |         | 113.1                                | 898@20                                                                      | -                                                          | 108 cycles; 36 h                   | 24        |
| N-GRW                                                | 1.46    | 65                                   | 873@20                                                                      |                                                            | 150 cycles/160 h                   | 25        |
| Meso-CoNC@GF                                         | 1.51    | 154.4                                | -                                                                           | -                                                          | 630 cycles; 105 h                  | 26        |
| CuS/NiS <sub>2</sub>                                 | 1.44    | 172.4                                | 775@5                                                                       | 1015.2@5                                                   | 200 cycles; 83 h                   | 27        |

## References

1. Z. Yang, C. Zhao, Y. Qu, H. Zhou, F. Zhou, J. Wang, Y. Wu and Y. Li, *Adv. Mater.*, 2019, **31**, 1808043.
2. G. Fu, Z. Cui, Y. Chen, Y. Li, Y. Tang and J. B. Goodenough, *Adv. Energy Mater.*, 2017, **7**, 1601172.
3. Q. Wang, L. Shang, R. Shi, X. Zhang, Y. Zhao, G. I. N. Waterhouse, L.-Z. Wu, C.-H. Tung and T. Zhang, *Adv. Energy Mater.*, 2017, **7**, 1700467.
4. S. Mao, Z. Wen, T. Huang, Y. Hou and J. Chen, *Energy Environ. Sci.*, 2014, **7**, 609-616.
5. Y. Gorlin and T. F. Jaramillo, *J. Am. Chem. Soc.*, 2010, **132**, 13612-13614.
6. J. Zhu, M. Xiao, Y. Zhang, Z. Jin, Z. Peng, C. Liu, S. Chen, J. Ge and W. Xing, *ACS Catal.*, 2016, **6**, 6335-6342.
7. Y. Jiang, Y.-P. Deng, J. Fu, D. U. Lee, R. Liang, Z. P. Cano, Y. Liu, Z. Bai, S. Hwang, L. Yang, D. Su, W. Chu and Z. Chen, *Adv. Energy Mater.*, 2018, **8**, 1702900.
8. J. Yin, Y. Li, F. Lv, Q. Fan, Y.-Q. Zhao, Q. Zhang, W. Wang, F. Cheng, P. Xi and S. Guo, *ACS Nano*, 2017, **11**, 2275-2283.
9. P. Chen, T. Zhou, L. Xing, K. Xu, Y. Tong, H. Xie, L. Zhang, W. Yan, W. Chu, C. Wu and Y. Xie, *Angew. Chem., Int. Ed.*, 2017, **56**, 610-614.
10. T. V. Tam, S. G. Kang, M. H. Kim, S. G. Lee, S. H. Hur, J. S. Chung and W. M. Choi, *Adv. Energy Mater.*, 2019, **9**, 1900945.
11. G. Fu, X. Yan, Y. Chen, L. Xu, D. Sun, J.-M. Lee and Y. Tang, *Adv. Mater.*, 2018, **30**, 1704609.
12. G. Fu, Y. Chen, Z. Cui, Y. Li, W. Zhou, S. Xin, Y. Tang and J. B. Goodenough, *Nano Lett.*, 2016, **16**, 6516-6522.
13. S. Liu, Z. Wang, S. Zhou, F. Yu, M. Yu, C.-Y. Chiang, W. Zhou, J. Zhao and J. Qiu, *Adv. Mater.*, 2017, **29**, 1700874.
14. C. Tang, B. Wang, H.-F. Wang and Q. Zhang, *Adv. Mater.*, 2017, **29**, 1703185.
15. B. Chen, X. He, F. Yin, H. Wang, D.-J. Liu, R. Shi, J. Chen and H. Yin, *Adv. Funct. Mater.*, 2017, **27**, 1700795.
16. X. Han, X. Wu, C. Zhong, Y. Deng, N. Zhao and W. Hu, *Nano Energy*, 2017, **31**, 541-550.
17. J. Zhang, Z. Zhao, Z. Xia and L. Dai, *Nat. Nanotechnol.*, 2015, **10**, 444-452.
18. F. Meng, H. Zhong, D. Bao, J. Yan and X. Zhang, *J. Am. Chem. Soc.*, 2016, **138**, 10226-10231.
19. M. Zhang, Q. Dai, H. Zheng, M. Chen and L. Dai, *Adv. Mater.*, 2018, **30**, 1705431.
20. W. Niu, Z. Li, K. Marcus, L. Zhou, Y. Li, R. Ye, K. Liang and Y. Yang, *Adv. Energy Mater.*, 2018, **8**, 1701642.
21. C.-Y. Su, H. Cheng, W. Li, Z.-Q. Liu, N. Li, Z. Hou, F.-Q. Bai, H.-X. Zhang and T.-Y. Ma, *Adv. Energy Mater.*, 2017, **7**, 1602420.
22. Z. Q. Liu, H. Cheng, N. Li, T. Y. Ma and Y. Z. Su, *Adv. Mater.*, 2016, **28**, 3777-3784.
23. L. Wei, H. E. Karahan, S. Zhai, H. Liu, X. Chen, Z. Zhou, Y. Lei, Z. Liu and Y. Chen, *Adv. Mater.*, 2017, **29**, 1701410.
24. H.-F. Wang, C. Tang, B. Wang, B.-Q. Li and Q. Zhang, *Adv. Mater.*, 2017, **29**, 1702327.
25. H. B. Yang, J. Miao, S.-F. Hung, J. Chen, H. B. Tao, X. Wang, L. Zhang, R. Chen, J. Gao, H. M. Chen, L. Dai and B. Liu, *Sci. Adv.*, 2016, **2**, e1501122.
26. S. Liu, M. Wang, X. Sun, N. Xu, J. Liu, Y. Wang, T. Qian and C. Yan, *Adv. Mater.*, 2018, **30**, 1704898.
27. L. An, Y. Li, M. Luo, J. Yin, Y.-Q. Zhao, C. Xu, F. Cheng, Y. Yang, P. Xi and S. Guo, *Adv. Funct. Mater.*, 2017, **27**, 1703779.
